# Supplementary material for: Fluorescence enhancement of carbon dots by graphene for highly sensitive detection of tetracycline hydrochloride
Source: Royal Society of Chemistry journal article supplement (doi:10.1039/c8ra04581j), 2018-01-01
Supplement: c8ra04581j1.pdf [file c8ra04581j1.pdf]

**Electronic Supporting Information (ESI)**

**Enhancement Fluorescence of Carbon Dots by Graphene and Highly Sensitive  
Detection of Tetracycline Hydrochloride**

Wei He, Xiangying Sun\*, Wenting Weng, Bin Liu

*College of Materials Science and Engineering, Huaqiao University, Key Laboratory  
of Molecular Designing and Green Conversions (Fujian University), 361021 Xiamen,  
China.*

**Correspondence:**

E-mail: sunxy@hqu.edu.cn

Tel: +86592 6162225

Fax: +86592 6160088

## Contents

|                                                                                    |    |
|------------------------------------------------------------------------------------|----|
| 1. Synthesis of PDDA functionalized graphene with different reduction degree ..... | S3 |
| 2. Calculation the energy levels of CDs .....                                      | S3 |
| 3. Figures .....                                                                   | S3 |
| 4. Tables.....                                                                     | S7 |

## 1. Synthesis of PDDA functionalized graphene with different reduction degree

GO (1 mg/mL, 20 mL) was uniformly dispersed in water by ultrasonication for 3 h. PDDA solution (20%, 0.5 mL) was added to GO solution with vigorous stirring. After 3 h, hydrazine hydrate solution (0.5 mL) was added to the above solution and stirred for 5 min. Next, the mixture was reacted under hydrothermal conditions at 100 °C, room temperature and light (the distance between the control solution and the Xe lamp was 10 cm) for 3 h, respectively. Then, the resulting mixture was washed with ultrapure water, centrifuged several times to remove unreacted chemicals and freeze-dried at -40 °C under vacuum. Finally, PDDA-G, PDDA-RG and PDDA-LG solid powder were obtained, respectively.

## 2. Calculation the energy levels of CDs

To demonstrate the quenching mechanism of CDs, the HOMO and LUMO levels of CDs were calculated according to the following equation:

$$E_{\text{HOMO}} = -e(E_{\text{ox}} + 4.4) \text{ (eV)} \quad (1)$$

$$E_{\text{LUMO}} = -e(E_{\text{red}} + 4.4) \text{ (eV)} \quad (2)$$

$$E_{\text{HOMO}} = E_{\text{LUMO}} - E_{\text{g}} \quad (3)$$

where  $E_{\text{ox}}$  and  $E_{\text{red}}$  are onset of oxidation and reduction potential for CDs respectively. The  $E_{\text{red}}$  was determined to be -0.475 eV. The corresponding LUMO level was -3.93 eV. However, the HOMO energy could not be obtained due to the irreversible of the oxidation behavior (data not shown).  $E_{\text{g}}$  was estimated to be 3.54 eV ( $E_{\text{g}}$  resulting from the absorption edge in the absorption spectrum). So, the  $E_{\text{HOMO}}$  was calculated to be -7.47 eV.

## 3. Figures

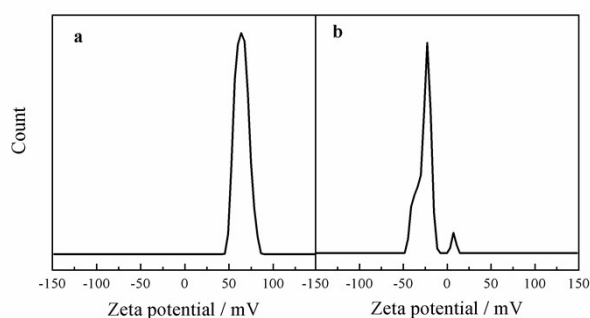

**Fig. S1** Zeta potential of PDDA-G (a) and CDs (b).

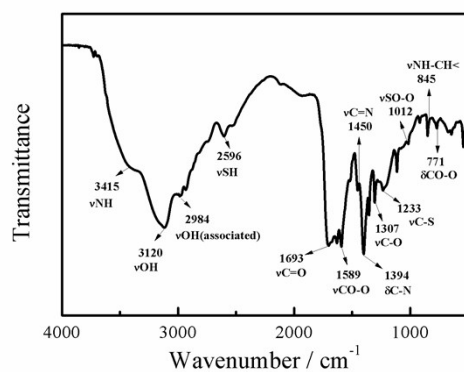

**Fig. S2** FTIR spectra of CDs .

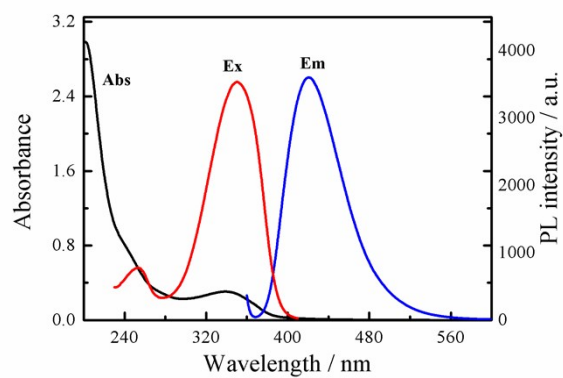

**Fig. S3** UV-Vis absorption spectra, excitation and emission spectra of CDs

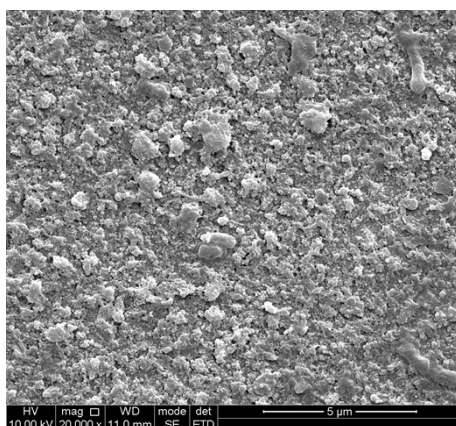

**Fig. S4** SEM images of Quartz/PDDA-G/(PSS/PDDA)<sub>3</sub>/CDs SAMs.

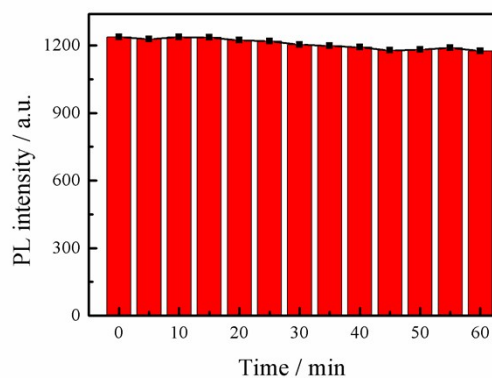

**Fig. S5** Fluorescence intensity of Quartz/PDDA-G/(PSS/PDDA)<sub>3</sub>/CDs SAMs for different irradiating time under UV lamp.

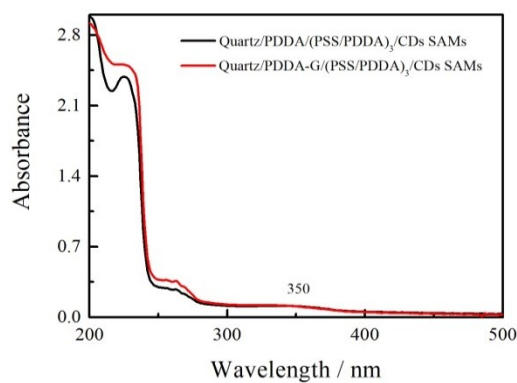

**Fig. S6** UV-Vis absorption spectra of Quartz/PDDA-G/(PSS/PDDA)<sub>3</sub>/CDs SAMs and Quartz/PDDA/(PSS/PDDA)<sub>3</sub>/CDs SAMs.

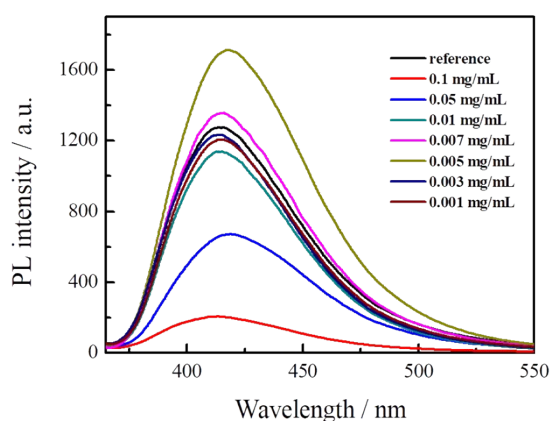

**Fig.S7** Fluorescence spectra of Quartz/PDDA-G/(PSS/PDDA)<sub>3</sub>/CDs SAMs with different PDDA-G concentration.

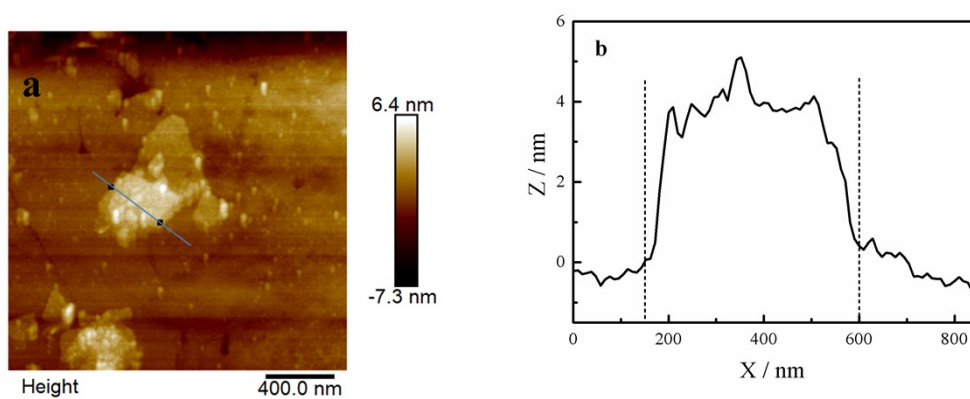

**Fig.S8** (a) AFM images of Quartz/PDDA-G flim. (b) Corresponding thickness.

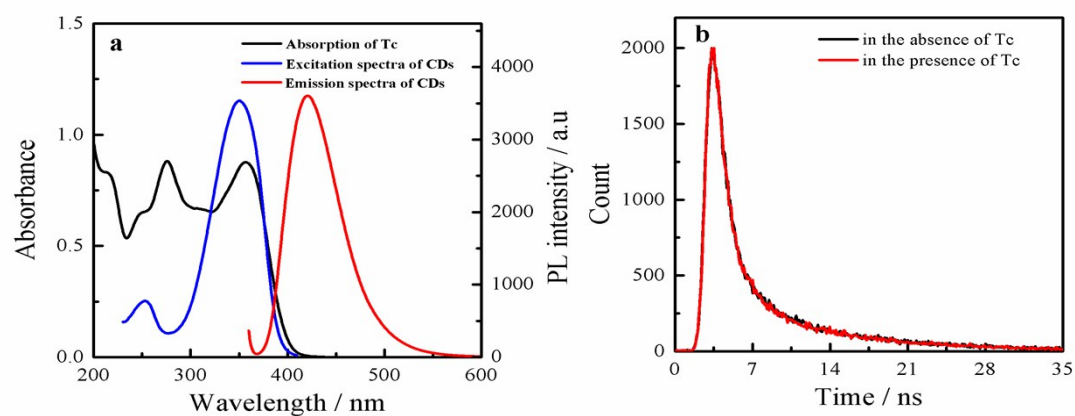

**Fig. S9** (a) UV-Vis absorption spectra of Tc, fluorescence emission and excitation spectrum of CDs. (b) Fluorescence decay curves of Quartz/PDDA-G/(PSS/PDDA)<sub>3</sub>/CDs SAMs in the absence or presence of 56.6 nM Tc.

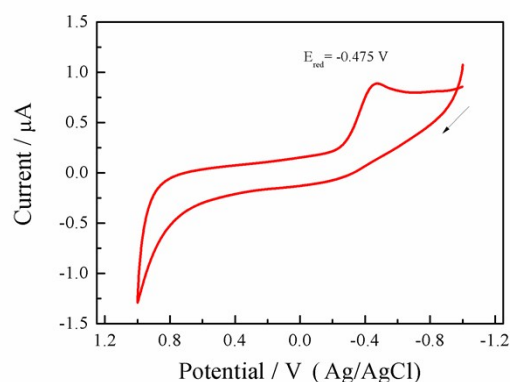

**Fig. S10** The cyclic voltammetry curve of 0.1 mg/ mL CDs in 0.1 M pH=7 PBS with platinum sheet as the working electrode, a Pt-wire counter electrode and an Ag/AgCl reference electrode.

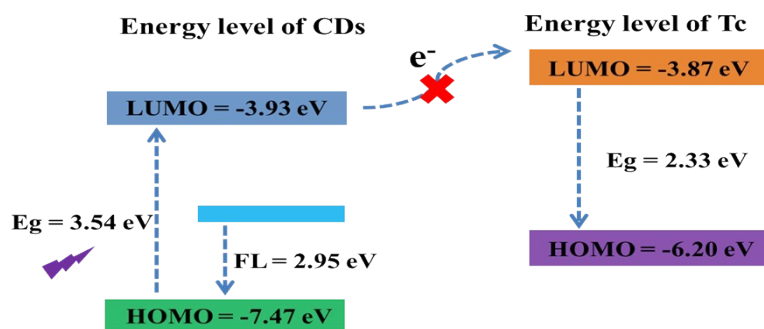

**Fig. S11** Energy levels of the LUOM and HOMO of CDs and Tc.

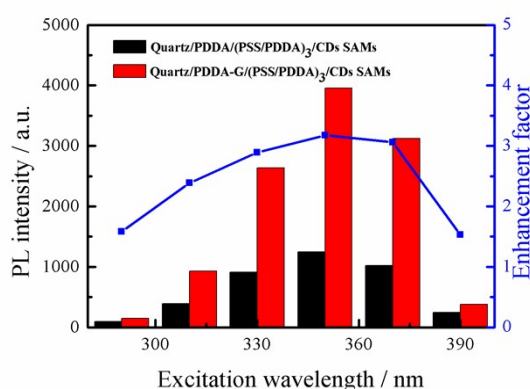

**Fig. S12** Fluorescence spectra of Quartz/PDDA/(PSS/PDDA)<sub>3</sub>/CDs SAMs and Quartz/PDDA-G/(PSS/PDDA)<sub>3</sub>/CDs SAMs and enhancement factor with different excitation wavelength.

#### 4. Tables

**Table S1** Comparison of CDs SAMs with different methods for the detection of Tc

| Analytical method                      | Sensor                  | Linear range( $\mu$ M) | LOD(nM) | Ref.      |
|----------------------------------------|-------------------------|------------------------|---------|-----------|
| Fluorescence                           | Eu <sup>3+</sup> -AgNPs | 0.0001-10              | 4       | 1         |
| Fluorescence                           | CDs                     | 2-150                  | 520     | 2         |
| Fluorescence                           | MQDs                    | 0.01-0.7               | 1.2     | 3         |
| Fluorescence                           | CDs@MIPs                | 0.02-14                | 5.5     | 4         |
| Capillary electrophoresis              | -                       | 0.1125-0.5625          | 3.29    | 5         |
| High performance liquid chromatography | -                       | 0.027-1.362            | 5.355   | 6         |
| Electrochemistry                       | Aptasensor              | 0.01125-11.25          | 2.25    | 7         |
| Fluorescence                           | CDs SAMs                | 0.004762-0.09091       | 0.9284  | This work |

**Table S2** Effect of interfering components on the detection of Tc

| Coexisting substance | Concentration (M)  | Change of fluorescence intensity (%) | Coexisting substance | Concentration (M)  | Change of fluorescence intensity (%) |
|----------------------|--------------------|--------------------------------------|----------------------|--------------------|--------------------------------------|
| Trimethoprim         | $1 \times 10^{-6}$ | -2.79                                | CoSO <sub>4</sub>    | $1 \times 10^{-6}$ | -1.99                                |
| 1,3,5-Triazine       | $1 \times 10^{-6}$ | -3.32                                | MgSO <sub>4</sub>    | $6 \times 10^{-6}$ | -1.84                                |

|                           |                    |       |                                   |                    |       |
|---------------------------|--------------------|-------|-----------------------------------|--------------------|-------|
| Cefotaxime sodium         | $1 \times 10^{-6}$ | -7.50 | ZnSO <sub>4</sub>                 | $5 \times 10^{-6}$ | -5.85 |
| Clindamycin hydrochloride | $1 \times 10^{-6}$ | +6.67 | CaCl <sub>2</sub>                 | $1 \times 10^{-6}$ | +4.97 |
| Procaine hydrochloride    | $1 \times 10^{-6}$ | -3.61 | KCl                               | $8 \times 10^{-6}$ | -2.84 |
| Aspartic acid             | $5 \times 10^{-6}$ | -8.83 | NaCl                              | $8 \times 10^{-6}$ | -3.22 |
| Lysine                    | $1 \times 10^{-6}$ | +4.15 | Fe(NO <sub>3</sub> ) <sub>3</sub> | $1 \times 10^{-6}$ | -4.35 |
| Glucose                   | $5 \times 10^{-6}$ | -3.41 | Hg(AC) <sub>2</sub>               | $2 \times 10^{-6}$ | -2.78 |

## References

- 1 H. L. Tan and Y. Chen, *Sensor Actuat B-Chem*, 2012, 173, 262-267.
- 2 M. Lin, H. Y. Zou, T. Yang, Z. X. Liu, H. Liu and C. Z. Huang, *Nanoscale*, 2016, 8, 2999-3007.
- 3 X. Li, C. Li and L. Chen, *New Journal of Chemistry*, 2015, 39, 9976-9982.
- 4 J. Hou, H. Y. Li, L. Wang, P. Zhang, T. Y. Zhou, H. Ding and L. Ding, *Talanta*, 2016, 146, 34-40.
- 5 I. S. Ibarra, J. A. Rodriguez, J. M. Miranda, M. Vega and E. Barrado, *Journal of Chromatography A*, 2011, 1218, 2196-2202.
- 6 L. F. Wang, J. D. Peng and L. M. Liu, *Analytica Chimica Acta*, 2008, 630, 101-106.
- 7 Y. J. Kim, Y. S. Kim, J. H. Niazi and M. B. Gu, *Bioproc Biosyst Eng*, 2010, 33, 31-37.
